# Supplementary material for: A purely inorganic germanium–molybdenum–oxo cluster with ruthenium participation for visible-light-driven CO2 reduction
Source: Royal Society of Chemistry journal article supplement (doi:10.1039/d4qi01137f), 2024-01-01
Supplement: d4qi01137f1.pdf [file d4qi01137f1.pdf]

## Supplementary materials

### **A purely inorganic germanium–molybdenum–oxo cluster with ruthenium participation for visible-light-driven CO<sub>2</sub> reduction**

Kunhong Li, Yumei Hong, Xinyi Ma, Yujie Zhao, Shihao Zhang, Pengtao Ma, Jingyang Niu\* and  
Jingping Wang\*

Henan Key Laboratory of Polyoxometalate Chemistry, College of Chemistry and Molecular  
Sciences, Henan University, Kaifeng, Henan 475004, (P. R. China), E-mail: jyniu@henu.edu.cn,  
jpwang@henu.edu.cn

## Table of contents

1. Supplementary Experimental Section
  - 1.1 Measurement of photocatalytic activity.
  - 1.2 The calculation of gas production ( $\mu\text{mol}\cdot\text{g}^{-1}$ ) and gas generation rate ( $\mu\text{mol}\cdot\text{g}^{-1}\cdot\text{h}^{-1}$ ).
  - 1.3 The calculation of apparent quantum yield (AQY).
  - 1.4 Electrochemical measurements.
  - 1.5 Photoluminescence (PL) measurements.
2. Figures
  - Fig. S1** The crystal image of  $\text{Ru}_2\text{Ge}_2\text{Mo}_{20}$  under an optical microscope.
  - Fig. S2** The photograph of the  $\text{CO}_2$  photoreduction quartz glass reactor.
  - Fig. S3** (a) x-axis and (b) z-axis and (c) y-axis ball-and-stick representation of the  $\text{Ru}_2\text{Ge}_2\text{Mo}_{20}$ .
  - Fig. S4** Simulated and experimental PXRD patterns of  $\text{Ru}_2\text{Ge}_2\text{Mo}_{20}$ .
  - Fig. S5** IR spectrum of  $\text{Ru}_2\text{Ge}_2\text{Mo}_{20}$ .
  - Fig. S6** TG curves of the  $\text{Ru}_2\text{Ge}_2\text{Mo}_{20}$ .
  - Fig. S7** GC profiles of  $\text{CO}_2$  reduction after reaction 6 h under normal condition.
  - Fig. S8**  $\text{CH}_4$  and  $\text{CO}$  production rates of photocatalytic  $\text{CO}_2$  reduction with (a) different sacrificial donors, different amounts of (b) catalyst and (c) PS and (d) TEOA.
  - Fig. S9** GC profiles of  $\text{CO}_2$  reduction after reaction 6 h under Ar condition.
  - Fig. S10** Recyclability experiments.
  - Fig. S11** (a) XPS spectra of the  $\text{Ru}_2\text{Ge}_2\text{Mo}_{20}$  before (black) and after (red) cycled reactions in survey scan. Mo 3d XPS spectra (b) before and (c) after photocatalysis of the  $\text{Ru}_2\text{Ge}_2\text{Mo}_{20}$ .
  - Fig. S12** (a) IR and (b) PXRD spectra of the  $\text{Ru}_2\text{Ge}_2\text{Mo}_{20}$  before and after the photocatalytic reaction.
3. Tables
  - Table S1** Crystallographic data of the  $\text{Ru}_2\text{Ge}_2\text{Mo}_{20}$ .
  - Table S2** Major bond lengths ( $\text{\AA}$ ) and bond angles ( $^\circ$ ) of the  $\text{Ru}_2\text{Ge}_2\text{Mo}_{20}$ .
  - Table S3** Calculated values of bond valence of Mo, Ge, Ru, and O atoms in anion  $\text{Ru}_2\text{Ge}_2\text{Mo}_{20}$ .
  - Table S4** Comparison of the performances of similar photocatalytic  $\text{CO}_2$  reduction systems based on POMs.
  - Table S5** The apparent quantum yield of  $\text{CH}_4$  and  $\text{CO}$  at different wavelength over  $\text{Ge}_2\text{Ru}_2\text{Mo}_{20}$ .
4. References

## 1 Supplementary Experimental Section.

### 1.1 Measurement of photocatalytic activity.

The photocatalytic reduction of CO<sub>2</sub> was conducted with a quartz glass reactor (CEL-APR100H-3, 100 mL) equipped with a Beijing China Education Au-light Technology Co., Ltd. 300 W xenon lamp (CEL-PF300-T6) with a UV-cutoff filter ( $\geq 420$  nm) as the visible light source. In a typical experiment, 5 mg of the photocatalyst and 7.5 mg [Ru(bpy)<sub>3</sub>]Cl<sub>2</sub>·6H<sub>2</sub>O were dispersed in 29 mL of the mixed solution of N,N-Dimethylformamide (DMF; 16 mL), H<sub>2</sub>O (8 mL), and triethanolamine (TEOA; 5 mL), and pre-degassed with CO<sub>2</sub> (99.999%) gas for 30 min to remove air before irradiation. Here TEOA serves as a sacrificial agent and [Ru(bpy)<sub>3</sub>]Cl<sub>2</sub>·6H<sub>2</sub>O acts as a photosensitizer. The reaction mixture was kept stirred constantly with a magnetic bar to ensure complete mixing of the photocatalyst particles. The temperature of the reaction was maintained at 20 °C by a cooling water. The gas product (0.5 mL, taken from the reactor) was analyzed using a gas chromatograph equipped with an FID and a TCD detector (Agilent GC-8890). The selectivity of the formed CO and CH<sub>4</sub> is calculated according to the following equation:

$$\text{selectivity of } CH_4 = \frac{8R(CH_4)}{8R(CH_4) + 2R(CO)} \times 100\%$$

$$\text{selectivity of } CO = \frac{2R(CO)}{8R(CH_4) + 2R(CO)} \times 100\%$$

where R(CO) and R(CH<sub>4</sub>) are the yields of reactively-formed CO and CH<sub>4</sub> respectively.

### 1.2 The calculation of gas production ( $\mu\text{mol}\cdot\text{g}^{-1}$ ) and gas generation rate ( $\mu\text{mol}\cdot\text{g}^{-1}\cdot\text{h}^{-1}$ ).

$$\begin{aligned} CH_4 \text{ or } CO \text{ production } (\mu\text{mol}/\text{g}) &= \frac{c(\text{ppm}) \times 10^{-6} \times V(\text{mL}) \times 10^{-3}}{22.4(\text{L}/\text{mol}) \times m(\text{mg}) \times 10^{-3}} \times 10^6 \\ &= \frac{c(\text{ppm}) \times V(\text{mL})}{22.4(\text{L}/\text{mol}) \times m(\text{mg})} \\ CH_4 \text{ or } CO \text{ yield rate } (\mu\text{mol}/\text{g}/\text{h}) &= \frac{c(\text{ppm}) \times 10^{-6} \times V(\text{mL}) \times 10^{-3}}{22.4(\text{L}/\text{mol}) \times m(\text{mg}) \times 10^{-3} \times t(\text{h})} \times 10^6 \\ &= \frac{c(\text{ppm}) \times V(\text{mL})}{22.4(\text{L}/\text{mol}) \times m(\text{mg}) \times t(\text{h})} \end{aligned}$$

$c(\text{ppm})$ : the concentration of CH<sub>4</sub> or CO;

$V(\text{mL})$ : the spare volume of photoreactor;

$m(\text{mg})$ : the mass of photocatalyst;

$t(\text{h})$ : the reaction time.

### 1.3 The calculation of apparent quantum yield (AQY).

The AQY is determined using a similar method to that for the photocatalytic performance test. Photocatalyst (5 mg), [Ru(bpy)<sub>3</sub>]Cl<sub>2</sub>·6H<sub>2</sub>O (7.5 mg), N,N-Dimethylformamide (DMF; 16 mL), H<sub>2</sub>O (8 mL), and triethanolamine (TEOA; 5 mL). The intensity of the incident light was tested by a photometer (CEL-NP2000-2A, Beijing China Education Au-light Technology Co., Ltd.), the irradiated area is 28.27 cm<sup>2</sup>.

The apparent quantum efficiency yield (AQY) at 420 nm, 460 nm, 500 nm, and 550 nm is calculated on the basis of the following equation:

$$AQY\% = \frac{\text{Number of reacted electrons } (N_e)}{\text{Number of incident photons } (N_p)} \times 100\%$$

$$AQY\% = \frac{10^9 \times (\nu \times N_A \times K) \times (h \times c)}{(I \times A \times \lambda)} \times 100\%$$

$$= \frac{1.2 \times 10^8 (\nu \times K)}{(I \times A \times \lambda)} \times 100\%$$

According to the following chemical reactions:

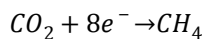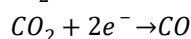

the AQY for CH<sub>4</sub> and CO evolution under different wavelengths are evaluated by the following equation:

$$AQY(CH_4)\% = \frac{\text{Number of } CH_4 \text{ molecules} \times 8}{\text{Number of incident photons}} \times 100\%$$

$$AQY(CO)\% = \frac{\text{Number of } CO \text{ molecules} \times 2}{\text{Number of incident photons}} \times 100\%$$

$\nu$ : the reaction rate (mol·s<sup>-1</sup>);

$N_A$ : the Avogadro constant (6.02 × 10<sup>23</sup> mol<sup>-1</sup>);

$K$ : Number of Transferred electrons (CH<sub>4</sub> = 8; CO = 2);

$h$ : the Planck constant (6.626 × 10<sup>-34</sup> J·s);

$c$ : the speed of light (3 × 10<sup>8</sup> m·s<sup>-1</sup>);

$I$ : the incident light intensity at certain wavelength (W·m<sup>-2</sup>);

$A$ : the irradiated area (m<sup>2</sup>);

$\lambda$ : the wavelength of incident light (nm);

#### 1.4 Electrochemical measurements.

All the electrochemical studies were performed on an electrochemical workstation (CHI-760E, Shanghai, China) with a standard three-electrode system with a glassy carbon as the working electrode, a Pt plate as the counter electrode, and an Ag/AgCl electrode as the reference electrode. The as-synthesized samples (5 mg) were added into 470 μL ethanol and 30 μL Poly (diallyldimethylammonium chloride) mixed solution under sonication for 30 min. Subsequently, 30 μL of the mixed solution was covered onto the side of ITO glass, and dried in room temperature. Photocurrent-time (I-t) curve and electrochemical impedance spectra were measured in 0.5M Na<sub>2</sub>SO<sub>4</sub> aqueous solution, where the I-t curve was performed under intermittent irradiation with a 300 W Xenon lamp source. High-purity N<sub>2</sub> was passed through the solution for at least 30 min to remove oxygen before the test.

#### 1.5 photoluminescence (PL) measurements.

Photoluminescence (PL) spectra are scanned on a photoluminescence spectrometer (FLS980) under an excitation wavelength of 368 nm. The photoluminescent quenching of [Ru(bpy)<sub>3</sub>]Cl<sub>2</sub>·6H<sub>2</sub>O (7.5 mg) were performed in 6 mL of the mixed solution of N,N-Dimethylformamide (DMF; 4 mL), H<sub>2</sub>O (2 mL) upon the addition of increasing amounts of **Ru<sub>2</sub>Ge<sub>2</sub>Mo<sub>20</sub>** (0.0 mg, 0.5 mg, 1.0 mg, 1.5 mg, and 2.0 mg). The photoluminescent quenching of [Ru(bpy)<sub>3</sub>]Cl<sub>2</sub>·6H<sub>2</sub>O (7.5 mg) were performed in 6 mL of the mixed solution of N,N-Dimethylformamide (DMF; 4 mL), H<sub>2</sub>O (2 mL) in different the amounts of TEOA (0 mM, 20 mM, 50 mM, and 100 mM).

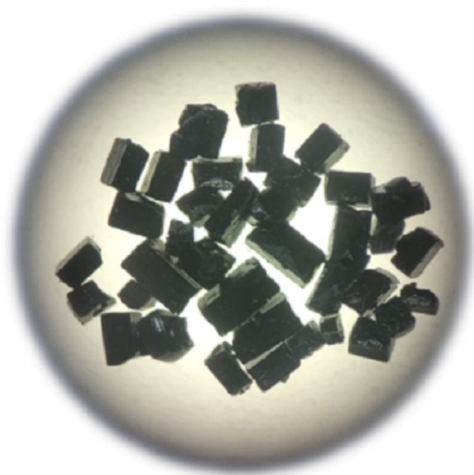

**Fig. S1** The crystal image of  $\text{Ru}_2\text{Ge}_2\text{Mo}_{20}$  under an optical microscope.

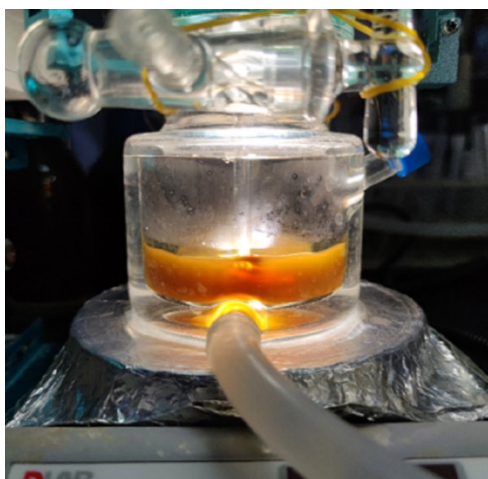

**Fig. S2** The photograph of the  $\text{CO}_2$  photoreduction quartz glass reactor.

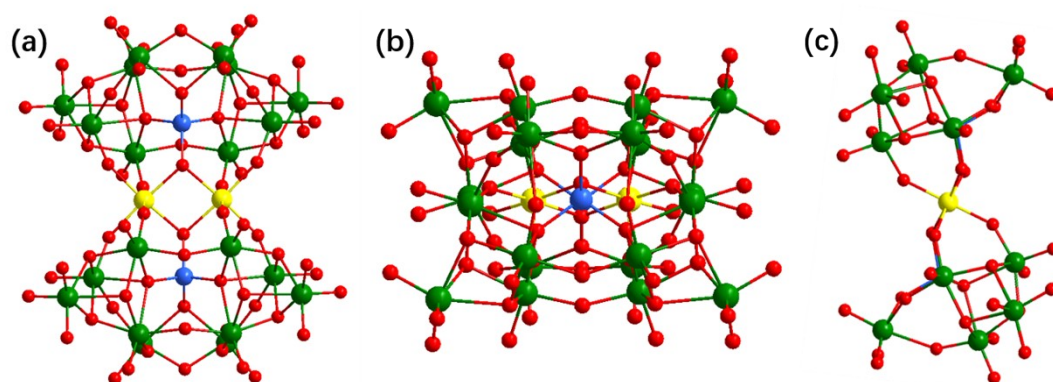

**Fig. S3** (a) x-axis and (b) z-axis and (c) y-axis ball-and-stick representation of the  $\text{Ru}_2\text{Ge}_2\text{Mo}_{20}$ .

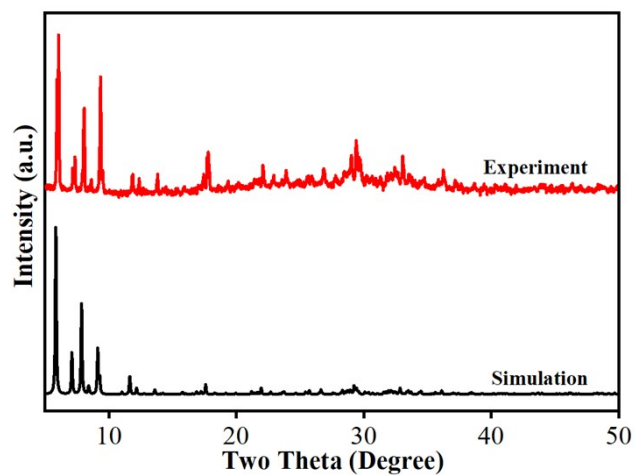

Fig. S4 Simulated and experimental PXRD patterns of  $\text{Ru}_2\text{Ge}_2\text{Mo}_{20}$ .

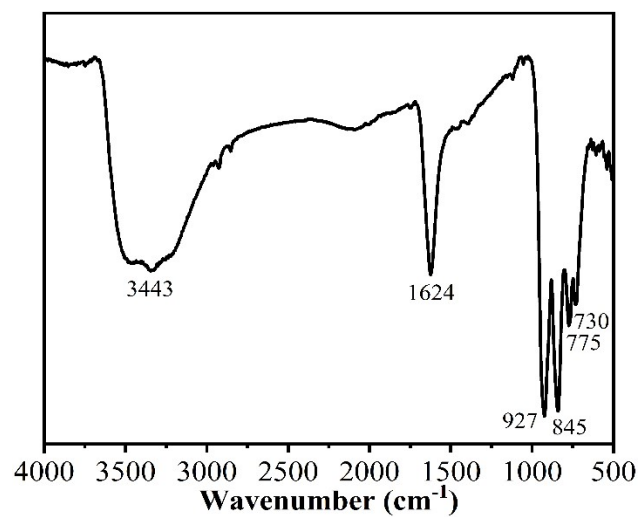

Fig. S5 IR spectrum of  $\text{Ru}_2\text{Ge}_2\text{Mo}_{20}$ .

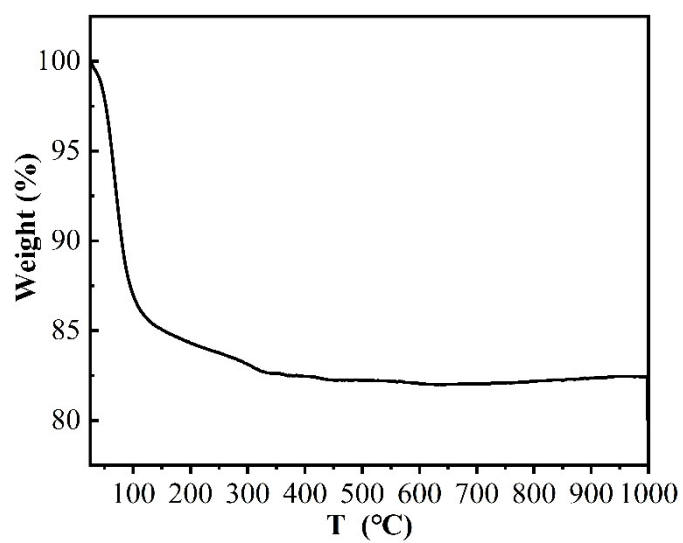

Fig. S6 TG curves of the  $\text{Ru}_2\text{Ge}_2\text{Mo}_{20}$ .

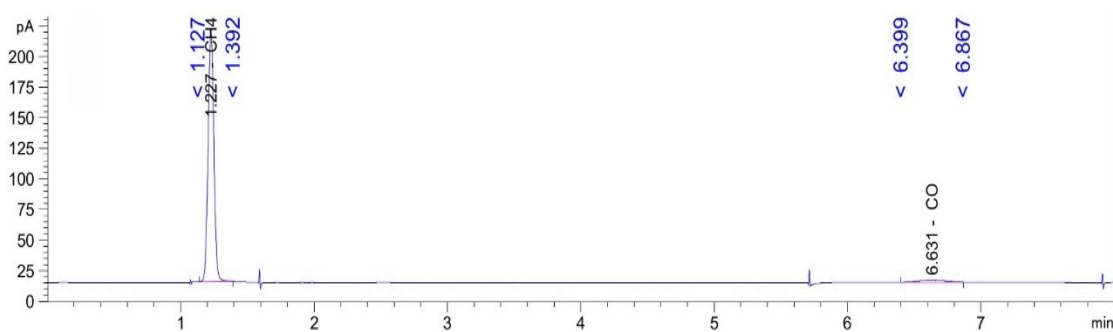

**Fig. S7** GC profiles of CO<sub>2</sub> reduction after reaction 6 h under normal condition.  
 Chromatographic column information: HP-5 column, 30 m × 320 μm × 0.25 μm  
 Detection information: oven (80 °C), TCD (250 °C), FID (275 °C)

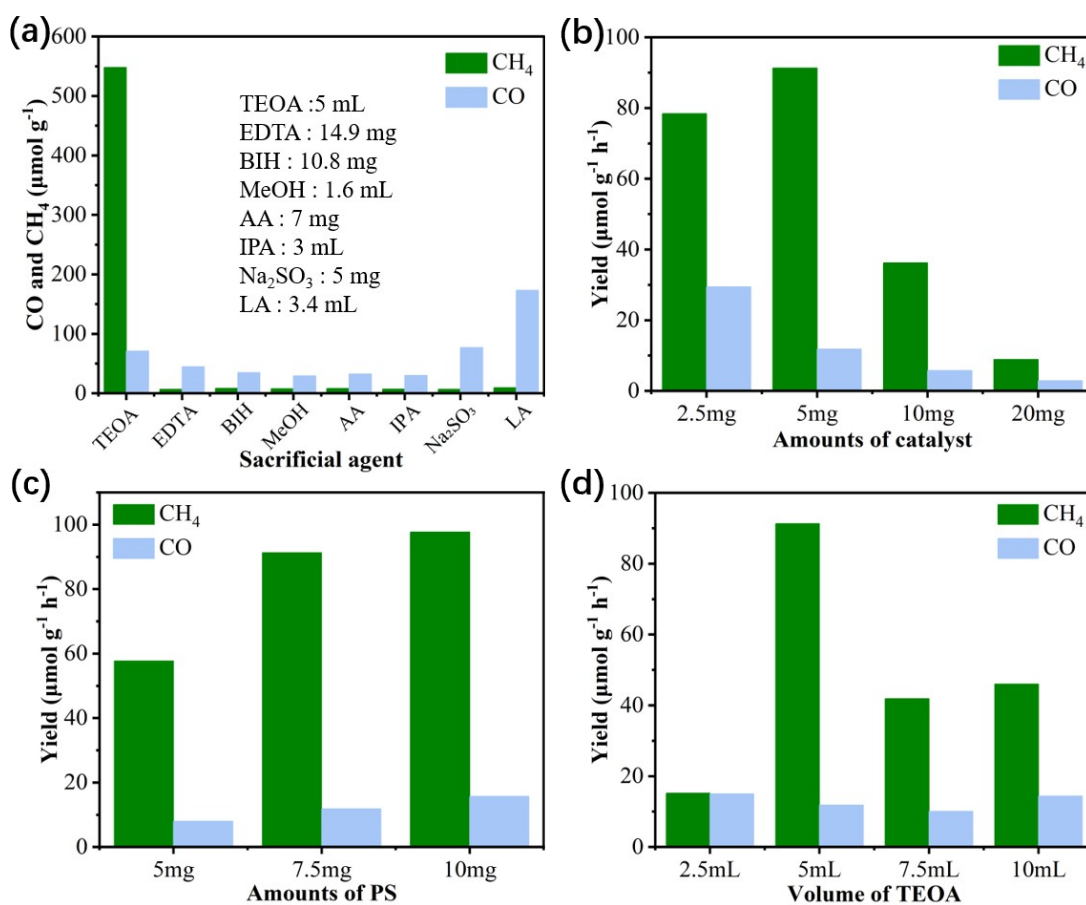

**Fig. S8** CH<sub>4</sub> and CO production rates of photocatalytic CO<sub>2</sub> reduction with (a) different sacrificial donors, different amounts of (b) catalyst and (c) PS and (d) TEOA.

As shown in **Fig. S8c–d**, an excess of PS or TEOA would lead to an insignificant increase or decrease in the evolution rate of products.

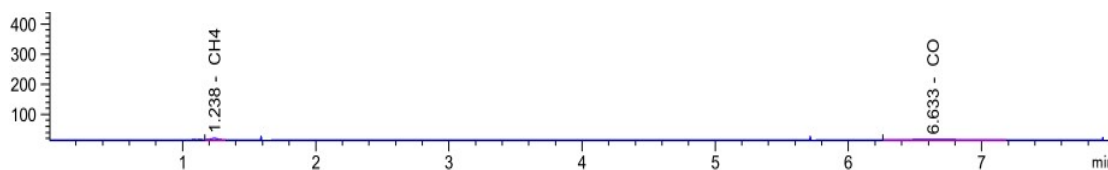

**Fig. S9** GC profiles of CO<sub>2</sub> reduction after reaction 6 h under Ar condition.

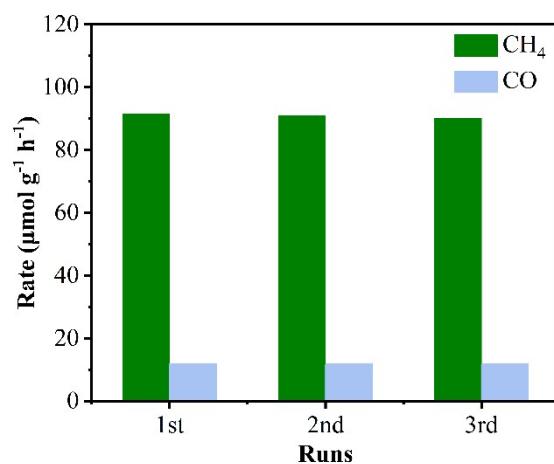

Fig. S10 Recyclability experiments.

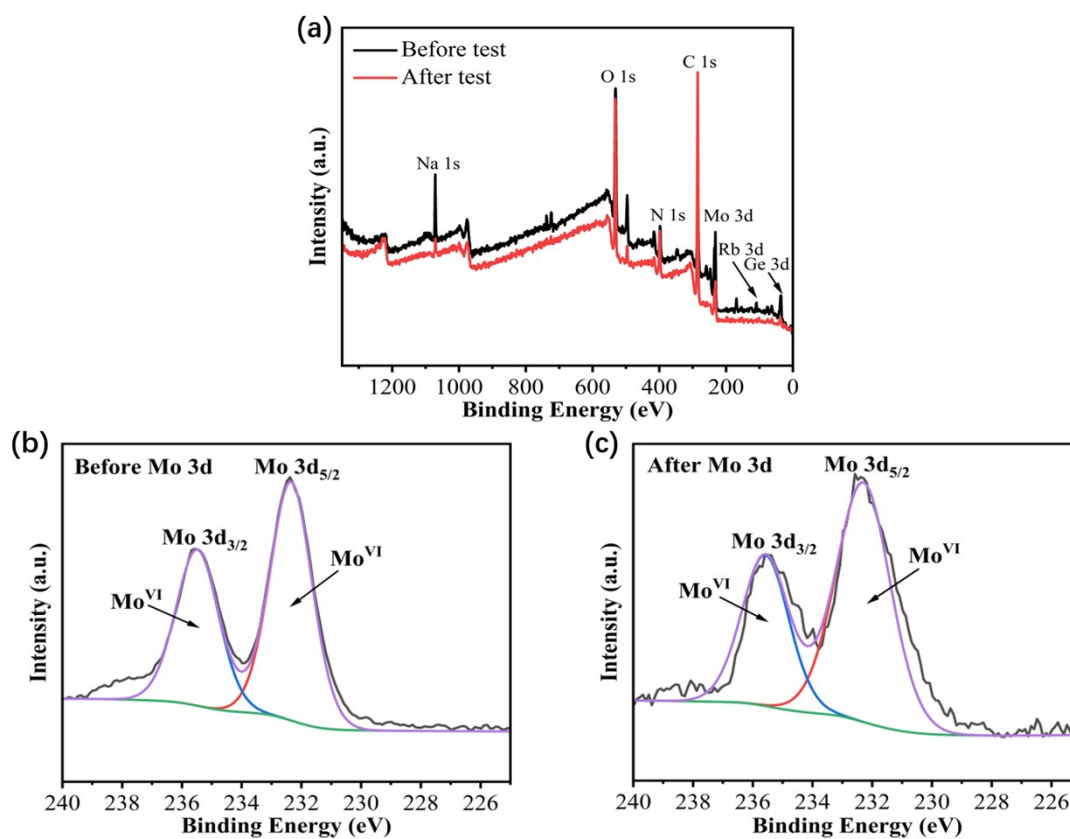

Fig. S11 (a) XPS spectra of the  $\text{Ru}_2\text{Ge}_2\text{Mo}_{20}$  before (black) and after (red) cycled reactions in survey scan. Mo3d XPS spectra (b) before and (c) after photocatalysis of the  $\text{Ru}_2\text{Ge}_2\text{Mo}_{20}$ .<sup>1,2</sup>



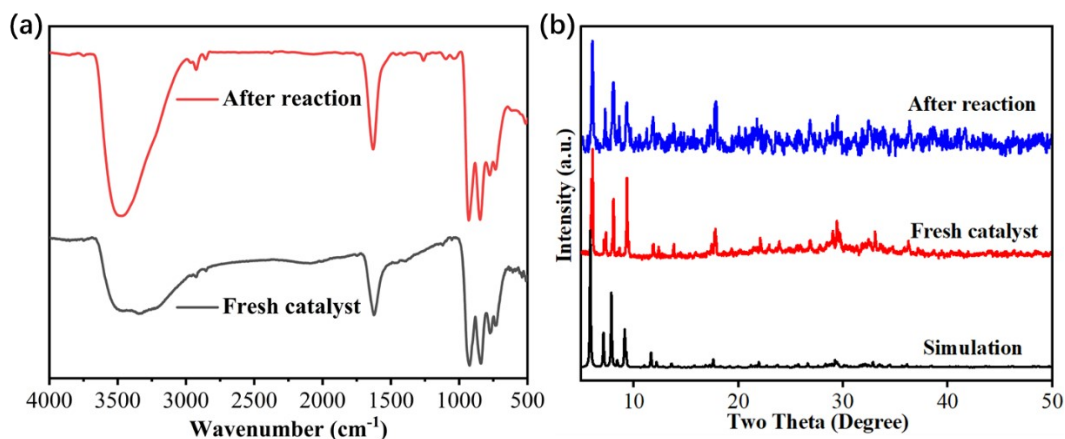

**Fig. S12** (a) IR and (b) PXRD spectra of the  $\text{Ru}_2\text{Ge}_2\text{Mo}_{20}$  before and after the photocatalytic reaction.

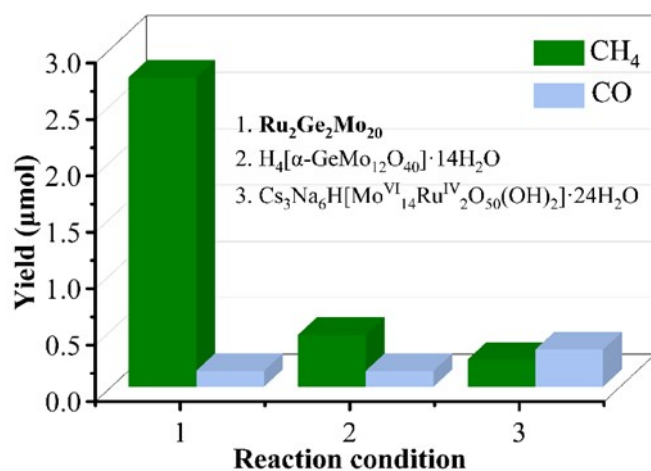

**Fig. S13** Comparison results of different catalysts.

(Reaction condition: **1** or **2** or **3** (0.001 mmol),  $[\text{Ru}(\text{bpy})_3]\text{Cl}_2 \cdot 6\text{H}_2\text{O}$  (7.5 mg), solution (DMF = 16 mL,  $\text{H}_2\text{O}$  = 8 mL, TEOA = 5 mL),  $\text{CO}_2$  (0.1 MPa),  $\geq 420$  nm, 20 °C, 6 h.)

**Table S1** Crystallographic data of the  $\text{Ru}_2\text{Ge}_2\text{Mo}_{20}$ .

| Empirical formula                        | $\text{Na}_{12}\text{Rb}_2\text{H}_{88}\text{Ge}_2\text{Ru}_2\text{Mo}_{20}\text{O}_{120}$ |
|------------------------------------------|--------------------------------------------------------------------------------------------|
| Formula weight                           | 4721.4132                                                                                  |
| Crystal system                           | orthorhombic                                                                               |
| Space group                              | <i>Pn</i> nm                                                                               |
| <i>a</i> / Å                             | 12.5569(4)                                                                                 |
| <i>b</i> / Å                             | 19.0577(5)                                                                                 |
| <i>c</i> / Å                             | 24.7605(8)                                                                                 |
| $\alpha = \beta = \gamma / ^\circ$       | 90                                                                                         |
| Volume / Å <sup>3</sup>                  | 5925.3(3)                                                                                  |
| <i>Z</i>                                 | 2                                                                                          |
| $\rho_{\text{calc}}$ g / cm <sup>3</sup> | 2.597                                                                                      |
| $\mu$ / mm <sup>-1</sup>                 | 3.765                                                                                      |

|                                 |                    |
|---------------------------------|--------------------|
| $F(000)$                        | 4316.0             |
| Crystal size / mm <sup>3</sup>  | 0.16 × 0.08 × 0.06 |
| Data/parameters                 | 5403/18/369        |
| $R_{\text{int}}$                | 0.0951             |
| GOF on $F^2$                    | 1.138              |
| $R_1, wR_2 [I \geq 2\sigma(I)]$ | 0.0722, 0.1602     |
| $R_1, wR_2 [\text{all data}]$   | 0.0866, 0.1677     |

**Table S2** Major bond lengths (Å) and bond angles (°) of the **Ru<sub>2</sub>Ge<sub>2</sub>Mo<sub>20</sub>**.

| Bond        | Length    | Bond        | Length    | Bond        | Length    |
|-------------|-----------|-------------|-----------|-------------|-----------|
| Ge1–O1      | 1.761(12) | Mo2–O11     | 1.757(9)  | Mo5–O2      | 1.788(8)  |
| Ge1–O6      | 1.757(9)  | Mo2–O16     | 1.688(9)  | Mo5–O3      | 1.898(4)  |
| Ge1–O6      | 1.757(9)  | Mo3–O11     | 2.291(9)  | Mo5–O4      | 2.002(8)  |
| Ge1–O13     | 1.764(13) | Mo3–O12     | 1.915(10) | Mo5–O6      | 2.295(8)  |
| Mo1–O5      | 1.788(8)  | Mo3–O13     | 2.225(8)  | Mo5–O8      | 2.071(9)  |
| Mo1–O6      | 2.282(9)  | Mo3–O14     | 1.935(7)  | Mo5–O10     | 1.717(9)  |
| Mo1–O7      | 2.052(9)  | Mo3–O20     | 1.733(11) | Mo5–Rb1     | 4.105(2)  |
| Mo1–O8      | 2.025(9)  | Mo3–O21     | 1.726(9)  | Mo5–Rb1     | 4.208(3)  |
| Mo1–O12     | 1.897(10) | Mo4–O4      | 2.266(9)  | O1–Ru1      | 2.059(8)  |
| Mo1–O15     | 1.726(10) | Mo4–O7      | 2.219(10) | O2–Ru1      | 2.003(8)  |
| Mo2–O4      | 2.085(9)  | Mo4–O8      | 2.181(9)  | O5–Ru1      | 1.996(8)  |
| Mo2–O6      | 2.305(8)  | Mo4–O17     | 1.745(10) | Mo2–O9      | 1.897(4)  |
| Mo2–O7      | 2.030(10) | Mo4–O18     | 1.746(10) | Mo4–O19     | 1.748(10) |
| Bond        | Angle     | Bond        | Angle     | Bond        | Angle     |
| O1–Ge1–O13  | 109.5(6)  | O16–Mo2–O6  | 170.7(4)  | O18–Mo4–O19 | 104.6(5)  |
| O6–Ge1–O1   | 108.1(3)  | O16–Mo2–O7  | 100.5(5)  | O19–Mo4–O4  | 90.0(4)   |
| O5–Mo1–O6   | 84.3(3)   | O16–Mo2–O9  | 99.2(5)   | O19–Mo4–O7  | 91.3(4)   |
| O5–Mo1–O8   | 90.5(4)   | O16–Mo2–O11 | 103.9(5)  | O19–Mo4–O8  | 154.8(4)  |
| O5–Mo1–O12  | 99.0(4)   | O12–Mo3–O11 | 79.7(4)   | O2–Mo5–O3   | 97.1(4)   |
| O7–Mo1–O6   | 75.2(3)   | O12–Mo3–O13 | 83.9(4)   | O2–Mo5–O4   | 155.1(4)  |
| O8–Mo1–O6   | 75.5(3)   | O12–Mo3–O14 | 152.3(5)  | O2–Mo5–O6   | 82.9(3)   |
| O8–Mo1–O7   | 75.7(4)   | O13–Mo3–O11 | 79.1(4)   | O2–Mo5–O8   | 88.6(4)   |
| O12–Mo1–O6  | 81.9(4)   | O14–Mo3–O11 | 81.4(5)   | O3–Mo5–O4   | 90.9(4)   |
| O12–Mo1–O7  | 87.3(4)   | O14–Mo3–O13 | 72.8(4)   | O3–Mo5–O6   | 85.8(4)   |
| O12–Mo1–O8  | 154.5(4)  | O20–Mo3–O11 | 85.5(4)   | O3–Mo5–O8   | 158.6(4)  |
| O15–Mo1–O5  | 102.2(4)  | O20–Mo3–O12 | 101.4(5)  | O4–Mo5–O6   | 74.1(3)   |
| O15–Mo1–O6  | 172.5(4)  | O20–Mo3–O13 | 162.6(5)  | O4–Mo5–O8   | 76.1(4)   |
| O15–Mo1–O7  | 97.7(4)   | O20–Mo3–O14 | 97.1(5)   | O8–Mo5–O6   | 74.4(3)   |
| O15–Mo1–O8  | 100.6(4)  | O21–Mo3–O11 | 170.9(4)  | O10–Mo5–O2  | 102.7(4)  |
| O15–Mo1–O12 | 100.4(5)  | O21–Mo3–O12 | 96.7(5)   | O10–Mo5–O3  | 99.5(5)   |

|             |          |             |          |             |          |
|-------------|----------|-------------|----------|-------------|----------|
| O4–Mo2–O6   | 72.4(3)  | O21–Mo3–O13 | 92.3(5)  | O10–Mo5–O4  | 99.2(4)  |
| O7–Mo2–O4   | 77.3(4)  | O21–Mo3–O14 | 98.9(6)  | O10–Mo5–O6  | 171.6(4) |
| O7–Mo2–O6   | 75.1(3)  | O21–Mo3–O20 | 103.4(5) | O10–Mo5–O8  | 99.3(4)  |
| O9–Mo2–O4   | 87.6(4)  | O7–Mo4–O4   | 70.0(3)  | Ge1–O1–Ru1  | 122.3(4) |
| O9–Mo2–O6   | 83.6(4)  | O8–Mo4–O4   | 68.7(3)  | Ru1–O1–Ru1  | 95.0(5)  |
| O9–Mo2–O7   | 156.7(4) | O8–Mo4–O7   | 69.3(3)  | Mo5–O2–Ru1  | 145.6(5) |
| O11–Mo2–O4  | 155.8(4) | O17–Mo4–O4  | 155.3(4) | Mo5–O3–Mo5  | 146.9(7) |
| O11–Mo2–O6  | 84.5(4)  | O17–Mo4–O7  | 88.5(4)  | Mo2–O4–Mo4  | 100.0(4) |
| O11–Mo2–O7  | 90.1(4)  | O17–Mo4–O8  | 92.8(4)  | Mo5–O4–Mo2  | 115.3(4) |
| O11–Mo2–O9  | 97.0(5)  | O17–Mo4–O18 | 104.5(5) | Mo5–O4–Mo4  | 102.9(4) |
| O16–Mo2–O4  | 98.7(4)  | O17–Mo4–O19 | 102.9(5) | Mo1–O5–Ru1  | 143.6(5) |
| Ge1–O6–Mo2  | 118.9(4) | O18–Mo4–O4  | 92.3(4)  | Ge1–O6–Mo1  | 120.3(4) |
| Ge1–O6–Mo5  | 122.9(4) | O18–Mo4–O7  | 156.3(4) | Mo5–O8–Mo4  | 103.6(4) |
| Mo1–O6–Mo2  | 95.5(3)  | O18–Mo4–O8  | 90.0(4)  | Mo2–O9–Mo2  | 142.9(7) |
| Mo1–O6–Mo5  | 95.9(3)  | Mo1–O7–Mo4  | 102.6(4) | Mo2–O11–Mo3 | 145.3(5) |
| Mo5–O6–Mo2  | 97.3(3)  | Mo2–O7–Mo1  | 112.5(5) | O5–Ru1–O2   | 86.3(3)  |
| O2–Ru1–O2   | 178.7(5) | O5–Ru1–O1   | 91.5(3)  | O5–Ru1–O2   | 92.7(3)  |
| Ge1–O13–Mo3 | 125.5(4) | Mo1–O8–Mo4  | 104.9(4) | O5–Ru1–O2   | 86.3(3)  |
| Mo3–O13–Mo3 | 95.5(5)  | Mo1–O8–Mo5  | 112.1(4) | O5–Ru1–O2   | 92.7(3)  |
| Mo3–O14–Mo3 | 116.7(6) | O1–Ru1–O1   | 85.0(5)  | O5–Ru1–O5   | 92.3(5)  |
| Mo3–O20–Na3 | 157.4(7) | O2–Ru1–O1   | 89.6(4)  | O5–Ru1–O1   | 174.6(4) |

**Table S3** Calculated values of bond valence of Mo, Ge, Ru and O atoms in anion **Ru<sub>2</sub>Ge<sub>2</sub>Mo<sub>20</sub>**.

| Atom Lable | BVS   | Atom Lable | BVS   |
|------------|-------|------------|-------|
| Mo1        | 5.93  | O8         | 1.886 |
| Mo2        | 6.142 | O9         | 2.099 |
| Mo3        | 6.044 | O10        | 1.707 |
| Mo4        | 6.046 | O11        | 1.894 |
| Mo5        | 5.968 | O12        | 2.049 |
| Ru1        | 3.067 | O13        | 1.822 |
| Ge1        | 3.875 | O14        | 1.894 |
| O1         | 1.881 | O15        | 1.666 |
| O2         | 1.780 | O16        | 1.846 |
| O3         | 1.854 | O17        | 1.583 |
| O4         | 1.737 | O18        | 1.578 |
| O5         | 1.952 | O19        | 1.570 |
| O6         | 2.053 | O20        | 1.635 |
| O7         | 1.863 |            |       |

**Table S4** Comparison of similar photocatalytic CO<sub>2</sub> reduction systems based on POMs and some other materials.

| Catalysts                                                                                                                                                                                                                                                                                                                                                                                                                                                             | Reactants                                    | Light source                    | Photosensitizer sacrificial reagent                               | Major products (μmol g <sup>-1</sup> h <sup>-1</sup> )        | Ref.      |
|-----------------------------------------------------------------------------------------------------------------------------------------------------------------------------------------------------------------------------------------------------------------------------------------------------------------------------------------------------------------------------------------------------------------------------------------------------------------------|----------------------------------------------|---------------------------------|-------------------------------------------------------------------|---------------------------------------------------------------|-----------|
| Na <sub>12</sub> Rb <sub>2</sub> [Ru <sub>2</sub> O <sub>2</sub> (GeMo <sub>10</sub> O <sub>36</sub> ) <sub>2</sub> ]·44H <sub>2</sub> O                                                                                                                                                                                                                                                                                                                              | CO <sub>2</sub> , DMF, H <sub>2</sub> O      | 300W Xe lamp (λ≥420nm)          | [Ru(bpy) <sub>3</sub> ]Cl <sub>2</sub> ·6H <sub>2</sub> O<br>TEOA | CH <sub>4</sub> 91.31<br>CO 11.85                             | This work |
| <b>NENU-605</b>                                                                                                                                                                                                                                                                                                                                                                                                                                                       | CO <sub>2</sub> , H <sub>2</sub> O           | 300W Xe lamp (λ≥420nm)          | [Ru(bpy) <sub>3</sub> ]Cl <sub>2</sub> ·6H <sub>2</sub> O<br>TEOA | CH <sub>4</sub> 0.894 CO<br>0.267                             | <b>3</b>  |
| <b>NENU-606</b>                                                                                                                                                                                                                                                                                                                                                                                                                                                       |                                              |                                 |                                                                   | CH <sub>4</sub> 1.747 CO<br>0.295                             |           |
| V <sub>12</sub> B <sub>18</sub> -Co                                                                                                                                                                                                                                                                                                                                                                                                                                   | CO <sub>2</sub> , MeCN, H <sub>2</sub> O     | 300W Xe lamp (λ≥420nm)          | [Ru(bpy) <sub>3</sub> ]Cl <sub>2</sub> ·6H <sub>2</sub> O<br>TEOA | CO 5700 H <sub>2</sub> 3800<br>HCOOH 168                      | <b>4</b>  |
| V <sub>12</sub> B <sub>18</sub> -Ni                                                                                                                                                                                                                                                                                                                                                                                                                                   |                                              |                                 |                                                                   | CO 3200 H <sub>2</sub> 300<br>HCOOH 260                       |           |
| [Co <sub>2.67</sub> (SiW <sub>12</sub> O <sub>40</sub> )(H <sub>2</sub> O) <sub>4</sub> (Htrz) <sub>4</sub> ]·Cl <sub>1.33</sub><br>[Co <sub>3</sub> (SiW <sub>12</sub> O <sub>40</sub> (H <sub>2</sub> O) <sub>5</sub> (Htrz) <sub>6</sub> Cl)]·Cl·6H <sub>2</sub> O                                                                                                                                                                                                 | CO <sub>2</sub> , MeCN, H <sub>2</sub> O     | 300W Xe lamp (λ≥420nm)          | [Ru(bpy) <sub>3</sub> ]Cl <sub>2</sub> ·6H <sub>2</sub> O<br>TEOA | CO 5235 H <sub>2</sub> 4840<br>CO 6167 H <sub>2</sub> 6070    | <b>5</b>  |
| (C <sub>2</sub> H <sub>5</sub> OH)(C <sub>3</sub> H <sub>5</sub> N <sub>2</sub> ) <sub>6</sub> [Co <sub>3</sub> (H <sub>6</sub> P <sub>4</sub> Mo <sub>6</sub> O <sub>31</sub> ) <sub>2</sub> ]·H <sub>2</sub> O                                                                                                                                                                                                                                                      | CO <sub>2</sub> , MeCN                       | 300W Xe lamp (λ≥420nm)          | [Ru(bpy) <sub>3</sub> ]Cl <sub>2</sub> ·6H <sub>2</sub> O<br>TEOA | CO 723.6                                                      | <b>6</b>  |
| Na <sub>6</sub> [Co(H <sub>2</sub> O) <sub>2</sub> (H <sub>2</sub> tib) <sub>2</sub> ]{Co[Mo <sub>6</sub> O <sub>15</sub> (HPO <sub>4</sub> ) <sub>4</sub> ] <sub>2</sub> }·5H <sub>2</sub> O<br>Na <sub>3</sub> [Co(H <sub>2</sub> O) <sub>3</sub> ][Co <sub>2</sub> (bib)(H <sub>2</sub> bib) <sub>2.5</sub> ]{HCo[Mo <sub>6</sub> O <sub>14</sub> (OH)(HPO <sub>4</sub> ) <sub>4</sub> ] <sub>2</sub> }·4H <sub>2</sub> O                                          | CO <sub>2</sub> , H <sub>2</sub> O           | 300W Xe lamp (λ≥420nm)          | [Ru(bpy) <sub>3</sub> ]Cl <sub>2</sub> ·6H <sub>2</sub> O<br>TEOA | CO 1.09<br>CH <sub>4</sub> 0.042                              | <b>7</b>  |
| (H <sub>2</sub> bpp) <sub>1.5</sub> {Na[Mo <sub>6</sub> O <sub>12</sub> (OH) <sub>3</sub> (HPO <sub>4</sub> )(H <sub>2</sub> PO <sub>4</sub> ) <sub>3</sub> ] <sub>2</sub> }·3H <sub>2</sub> O                                                                                                                                                                                                                                                                        |                                              |                                 |                                                                   | CO 0.937 CH <sub>4</sub><br>0.035                             |           |
| [Ni <sub>6</sub> (trz) <sub>2</sub> (Htrz) <sub>13</sub> ][H <sub>6</sub> P <sub>4</sub> Mo <sub>10</sub> O <sub>50</sub> ]·7H <sub>2</sub> O                                                                                                                                                                                                                                                                                                                         | CO <sub>2</sub> , MeCN, H <sub>2</sub> O     | 300W Xe lamp (λ≥420nm)          | [Ru(bpy) <sub>3</sub> ]Cl <sub>2</sub> ·6H <sub>2</sub> O<br>TEOA | CO 689.86<br>H <sub>2</sub> 158.39                            | <b>8</b>  |
| [Co(H <sub>2</sub> O) <sub>6</sub> ][Co-POM]                                                                                                                                                                                                                                                                                                                                                                                                                          | CO <sub>2</sub> , MeCN, H <sub>2</sub> O     | 300W Xe lamp (λ≥420nm)          | [Ru(bpy) <sub>3</sub> ]Cl <sub>2</sub> ·6H <sub>2</sub> O<br>TEOA | syngas 33700                                                  | <b>9</b>  |
| K <sub>10</sub> [Zn <sub>4</sub> (H <sub>2</sub> O) <sub>2</sub> (PW <sub>9</sub> O <sub>34</sub> ) <sub>2</sub> ]·24H <sub>2</sub> O                                                                                                                                                                                                                                                                                                                                 | CO <sub>2</sub> , KHCO <sub>3</sub> solution | 300W Xe lamp (λ≥400nm)          | TrI <sub>3</sub> Na <sub>2</sub> SO <sub>3</sub>                  | CH <sub>4</sub> 0.693                                         | <b>10</b> |
| H <sub>7</sub> Na <sub>19</sub> (H <sub>2</sub> O) <sub>26</sub> {Ni <sub>12</sub> (OH) <sub>9</sub> (PO <sub>4</sub> ) <sub>4</sub> (A-α-SiW <sub>9</sub> O <sub>34</sub> )[W <sub>4</sub> O <sub>10</sub> (OH)(PO <sub>2</sub> (OH) <sub>2</sub> )(A-α-SiW <sub>9</sub> O <sub>34</sub> ) <sub>2</sub> ]}·4C <sub>2</sub> H <sub>5</sub> N·27H <sub>2</sub> O                                                                                                       | CO <sub>2</sub> , MeCN, H <sub>2</sub> O     | 300W Xe lamp (λ≥420nm)          | [Ru(bpy) <sub>3</sub> ]Cl <sub>2</sub> ·6H <sub>2</sub> O<br>TEOA | CO 1950 (1h)<br>H <sub>2</sub> 410 (1h)                       | <b>11</b> |
| H <sub>26.3</sub> K <sub>2.5</sub> Na(H <sub>2</sub> O) <sub>16</sub> [Ni <sub>6</sub> (OH)(BO <sub>3</sub> ) <sub>2</sub> (dien) <sub>2</sub> (B-α-SiW <sub>10</sub> O <sub>37</sub> ) <sub>2</sub> ]·24H <sub>2</sub> O                                                                                                                                                                                                                                             | CO <sub>2</sub> , MeCN                       | 300W Xe lamp (420-800nm)        | [Ru(bpy) <sub>3</sub> ]Cl <sub>2</sub> ·6H <sub>2</sub> O<br>TEOA | CO 6988 (1h)<br>H <sub>2</sub> 1315 (1h)                      |           |
| <b>(Ru(bpy)<sub>3</sub>-Mn)</b><br><b>(Fe-Mn)</b>                                                                                                                                                                                                                                                                                                                                                                                                                     | CO <sub>2</sub> , H <sub>2</sub> O           | 280W Xe lamp (λ≥415nm)          | [Ru(bpy) <sub>3</sub> ]Cl <sub>2</sub> ·6H <sub>2</sub> O<br>TEOA | CH <sub>4</sub> 0.6 CO 0.104<br>CH <sub>4</sub> 1.44 CO 0.115 | <b>12</b> |
| Co <sub>2</sub> [Co <sub>20</sub> Mo <sub>16</sub> P <sub>24</sub> ]                                                                                                                                                                                                                                                                                                                                                                                                  | CO <sub>2</sub> , MeCN, H <sub>2</sub> O     | 300W Xe lamp (λ≥420nm)          | [Ru(bpy) <sub>3</sub> ]Cl <sub>2</sub> ·6H <sub>2</sub> O<br>TEOA | syngas 137900                                                 | <b>13</b> |
| [Co@{Co <sub>16</sub> Mo <sub>16</sub> }]                                                                                                                                                                                                                                                                                                                                                                                                                             | CO <sub>2</sub> , MeCN                       | 300W Xe lamp (λ≥420nm)          | [Ru(bpy) <sub>3</sub> ]Cl <sub>2</sub> ·6H <sub>2</sub> O<br>TEOA | CO 6764.3 (2h)<br>4489.3 (8h)                                 | <b>14</b> |
| [K(H <sub>2</sub> O) <sub>2</sub> Fe <sup>II</sup> <sub>0.33</sub> Co <sub>0.67</sub> (H <sub>2</sub> O) <sub>2</sub> (DAPSC)] <sub>2</sub> {[Fe <sup>II</sup> <sub>0.33</sub> Co <sub>0.67</sub> (H <sub>2</sub> O)(DAPSC)] <sub>2</sub> [Fe <sup>II</sup> <sub>0.33</sub> Co <sub>0.67</sub> (H <sub>2</sub> O) <sub>4</sub> ] <sub>2</sub> [Na <sub>2</sub> Fe <sup>III</sup> <sub>4</sub> P <sub>4</sub> W <sub>32</sub> O <sub>120</sub> ]}·21.5H <sub>2</sub> O | CO <sub>2</sub> , MeCN                       | 300W Xe lamp (420-800nm)        | [Ru(bpy) <sub>3</sub> ]Cl <sub>2</sub> ·6H <sub>2</sub> O<br>TEOA | CH <sub>4</sub> 135 H <sub>2</sub> 568.3<br>CO 6881.5         | <b>15</b> |
| [Co(H <sub>2</sub> O) <sub>2</sub> DABT] <sub>2</sub> [CrMo <sub>6</sub> (OH) <sub>5</sub> O <sub>19</sub> ]                                                                                                                                                                                                                                                                                                                                                          | CO <sub>2</sub> , MeCN                       | 300W Xe lamp (420-800nm)        | [Ru(bpy) <sub>3</sub> ]Cl <sub>2</sub> ·6H <sub>2</sub> O<br>TEOA | CH <sub>4</sub> 44.75 H <sub>2</sub><br>110.75<br>CO 1935.34  | <b>16</b> |
| [Zn(H <sub>2</sub> O) <sub>2</sub> DABT] <sub>2</sub> [CrMo <sub>6</sub> (OH) <sub>5</sub> O <sub>19</sub> ]                                                                                                                                                                                                                                                                                                                                                          |                                              |                                 |                                                                   | CO 82.018                                                     |           |
| H <sub>47</sub> Na <sub>2</sub> Co <sub>4</sub> Mo <sub>24</sub> (PO <sub>4</sub> ) <sub>11</sub> O <sub>72</sub> ·15H <sub>2</sub> O                                                                                                                                                                                                                                                                                                                                 | CO <sub>2</sub> , MeCN                       | 300W Xe lamp (420-800nm)        | [Ru(bpy) <sub>3</sub> ]Cl <sub>2</sub> ·6H <sub>2</sub> O<br>TEOA | CH <sub>4</sub> 56.5<br>CO 1848.3                             | <b>17</b> |
| Ni MOLs                                                                                                                                                                                                                                                                                                                                                                                                                                                               |                                              |                                 |                                                                   | syngas 12.78 mmol g <sup>-1</sup> h <sup>-1</sup>             |           |
| ZIF-76                                                                                                                                                                                                                                                                                                                                                                                                                                                                |                                              |                                 |                                                                   | syngas 9 mmol g <sup>-1</sup> h <sup>-1</sup>                 |           |
| Ni TDA MOFs                                                                                                                                                                                                                                                                                                                                                                                                                                                           | CO <sub>2</sub> , MeCN, H <sub>2</sub> O     | 5 W white LED light (420-800nm) | [Ru(bpy) <sub>3</sub> ]Cl <sub>2</sub> ·6H <sub>2</sub> O<br>TEOA | syngas 6.38 mmol g <sup>-1</sup> h <sup>-1</sup>              | <b>18</b> |
| Co TDA MOFs                                                                                                                                                                                                                                                                                                                                                                                                                                                           |                                              |                                 |                                                                   | syngas 4.92 mmol g <sup>-1</sup> h <sup>-1</sup>              |           |
| Ni MOLs                                                                                                                                                                                                                                                                                                                                                                                                                                                               |                                              |                                 |                                                                   | syngas 4.59 mmol g <sup>-1</sup> h <sup>-1</sup>              |           |

**Table S5** The apparent quantum yield of CH<sub>4</sub> and CO at different wavelength over **Ru<sub>2</sub>Ge<sub>2</sub>Mo<sub>20</sub>**.

| $\lambda$<br>(nm) | CH <sub>4</sub><br>( $\mu\text{mol}$ ) | CO<br>( $\mu\text{mol}$ ) | $I$<br>( $\text{W}\cdot\text{m}^{-2}$ ) | AQY <sub>CH<sub>4</sub></sub><br>(%) | AQY <sub>CO</sub><br>(%) |
|-------------------|----------------------------------------|---------------------------|-----------------------------------------|--------------------------------------|--------------------------|
| 420               | 0.0628                                 | 0.0902                    | 72.70                                   | 0.0093                               | 0.0034                   |
| 460               | 0.2385                                 | 0.1725                    | 76.25                                   | 0.0308                               | 0.0056                   |
| 500               | 0.0431                                 | 0.1035                    | 54.70                                   | 0.0071                               | 0.0043                   |
| 550               | 0.0410                                 | 0.0739                    | 78.20                                   | 0.0042                               | 0.0020                   |

## References

1. J. Xie, Y. Zhang, Y. Han and C. Li, High-Capacity Molecular Scale Conversion Anode Enabled by Hybridizing Cluster-Type Framework of High Loading with Amino-Functionalized Graphene, *ACS Nano*, 2016, **10**, 5304–5313.
2. J. G. Choi and L. T. Thompson, XPS study of as-prepared and reduced molybdenum oxides, *Appl. Surf. Sci.*, 1996, **93**, 143–149.
3. S.-L. Xie, J. Liu, L.-Z. Dong, S.-L. Li, Y.-Q. Lan and Z.-M. Su, Hetero-metallic active sites coupled with strongly reductive polyoxometalate for selective photocatalytic CO<sub>2</sub>-to-CH<sub>4</sub> conversion in water, *Chem. Sci.*, 2019, **10**, 185–190.
4. X. Yu, C.-C. Zhao, J.-X. Gu, C.-Y. Sun, H.-Y. Zheng, L.-K. Yan, M. Sun, X.-L. Wang and Z.-M. Su, Transition-Metal-Modified Vanadoborate Clusters as Stable and Efficient Photocatalysts for CO<sub>2</sub> Reduction, *Inorg. Chem.*, 2021, **60**, 7364–7371.
5. W. Yao, C. Qin, N. Xu, J. Zhou, C. Sun, L. Liu and Z. Su, Visible-light CO<sub>2</sub> photoreduction of polyoxometalate-based hybrids with different cobalt clusters, *CrystEngComm*, 2019, **21**, 6423–6431.
6. Z.-Y. Du, Z. Chen, R.-K. Kang, Y.-M. Han, J. Ding, J.-P. Cao, W. Jiang, M. Fang, H. Mei and Y. Xu, Two 2D Layered P<sub>4</sub>Mo<sub>6</sub> Clusters with Potential Bifunctional Properties: Proton Conduction and CO<sub>2</sub> Photoreduction, *Inorg. Chem.*, 2020, **59**, 12876–12883.
7. J. Du, Y. Ma, X. Xin, H. Na, Y. Zhao, H. Tan, Z. Han, Y. Li and Z. Kang, Reduced polyoxometalates and bipyridine ruthenium complex forming a tunable photocatalytic system for high efficient CO<sub>2</sub> reduction, *Chem. Eng. J.*, 2020, **398**, 125518.
8. M. Li, Y. Fu, S. You, Y. Yang, C. Qin, L. Zhao and Z. Su, Hexanuclear nickel-based [P<sub>4</sub>Mo<sub>11</sub>O<sub>50</sub>] with photocatalytic reduction of CO<sub>2</sub> activity, *Inorg. Chem. Commun.*, 2021, **134**, 109009.
9. X. Zhao, J. Zhou, C.-Y. Sun, S.-Q. You, X.-L. Wang and Z.-M. Su, A ruthenium/polyoxometalate for efficient CO<sub>2</sub> photoreduction under visible light in diluted CO<sub>2</sub>, *Nanotechnology*, 2020, **31**, 255402.
10. N. Kim, J. S. Nam, J. Jo, J. Seong, H. Kim, Y. Kwon, M. S. Lah, J. H. Lee, T.-H. Kwon and J. Ryu, Selective photocatalytic production of CH<sub>4</sub> using Zn-based polyoxometalate as a nonconventional CO<sub>2</sub> reduction catalyst, *Nanoscale Horiz.*, 2021, **6**, 379–385.
11. Y. Chen, Z.-W. Guo, Y.-P. Chen, Z.-Y. Zhuang, G.-Q. Wang, X.-X. Li, S.-T. Zheng and G.-Y. Yang, Two novel nickel cluster substituted polyoxometalates: syntheses, structures and their photocatalytic activities, magnetic behaviors, and proton conduction properties, *Inorg. Chem. Front.*, 2021, **8**, 1303–1311.
12. Y. Benseghir, A. Solé-Daura, P. Mialane, J. Marrot, L. Dalecky, S. Béchu, M. Frégnaux, M. Gomez-Mingot, M. Fontecave, C. Mellot-Draznieks and A. Dolbecq, Understanding the Photocatalytic Reduction of CO<sub>2</sub> with Heterometallic Molybdenum(V) Phosphate Polyoxometalates in Aqueous Media, *ACS Catal.*, 2021, **12**, 453–464.

13. H. Xu, S. You, Z. Lang, Y. Sun, C. Sun, J. Zhou, X. Wang, Z. Kang and Z. Su, Highly Efficient Photoreduction of Low-Concentration CO<sub>2</sub> to Syngas by Using a Polyoxometalates/Ru<sup>II</sup> Composite, *Chem. – Eur. J.*, 2020, **26**, 2735–2740.
14. C. Li, H.-Y. Jiang, J.-L. Wang, R.-K. Kang, H. Mei and Y. Xu, An isolated doughnut-like molybdenum(V) cobalto-phosphate cluster exhibiting excellent photocatalytic performance for carbon dioxide conversion, *Dalton Trans.*, 2022, **51**, 9616–9621.
15. J.-L. Zhou, X.-Y. Xiang, L.-T. Xu, J.-L. Wang, S.-M. Li, Y.-T. Yu, H. Mei and Y. Xu, Two bimetal-doped (Fe/Co, Mn) polyoxometalate-based hybrid compounds for visible-light-driven CO<sub>2</sub> reduction, *Dalton Trans.*, 2023, **52**, 9465–9471.
16. J.-B. Yang, J.-H. Pan, Y.-H. Zhu, J.-L. Wang, H. Mei and Y. Xu, Two 1D Anderson-Type Polyoxometalate-Based Metal–Organic Complexes as Bifunctional Heterogeneous Catalysts for CO<sub>2</sub> Photoreduction and Sulfur Oxidation, *Inorg. Chem.*, 2022, **61**, 11775–11786.
17. X. M. Liu, R. K. Kang, J. L. Wang, J. N. Li, Q. L. Chen and Y. Xu, A Purely Inorganic Quasi-Keggin Polyoxometalate for Photocatalytic Conversion of Carbon Dioxide to Carbon Monoxide, *ChemPlusChem*, 2021, **86**, 1014–1020.
18. B. Han, X. Ou, Z. Deng, Y. Song, C. Tian, H. Deng, Y. J. Xu and Z. Lin, Nickel Metal–Organic Framework Monolayers for Photoreduction of Diluted CO<sub>2</sub>: Metal-Node-Dependent Activity and Selectivity, *Angew. Chem. Int. Ed.*, 2018, **57**, 16811–16815.
